# Supplementary material for: Genome level analysis of rice mRNA 3′-end processing signals and alternative polyadenylation
Source: PubMed Central journal article supplement — Nucleic Acids Res. 2008 Apr 13;36(9):3150–61. doi: 10.1093/nar/gkn158 (PMC2396415; doi:10.1093/nar/gkn158), 2008-04-13
Supplement: gkn158_1.pdf [file gkn158_1.pdf]

## Shen et al. Supplemental Materials

Table S1 Parameters of forward-backward algorithm

| Symbol                         | Description                                                        |
|--------------------------------|--------------------------------------------------------------------|
| N                              | Number of states                                                   |
| $S = \{S_1, S_2, \dots, S_N\}$ | Set of states                                                      |
| M                              | Number of symbols can be observed at each state                    |
| $V = \{v_1, v_2, \dots, v_M\}$ | Set of observable discrete symbols                                 |
| $A = \{a_{ij}\}$               | The probability from state $S_i$ transferring to $S_j$             |
| $B = \{b_j(k)\}$               | Probability distribution of each observable symbols at state $S_j$ |
| $\pi = \{\pi_i\}$              | Initial distribution of state                                      |
| T                              | Length of observed sequence                                        |
| $D = \{D_i\}$                  | The largest sustained time in the state $S_i$                      |
| $P = \{p_i(d)\}$               | The probability of the sustained time to be d in the state $S_i$   |

Table S2 The signal state parameters

| Signal state | State length | Signal region | A                                                | T       | C       | G       |
|--------------|--------------|---------------|--------------------------------------------------|---------|---------|---------|
| NUE          | 6            | 269-288       | Obtained from matrix of transition probabilities |         |         |         |
| CS           | 2            | 299-300       | Obtained from matrix of transition probabilities |         |         |         |
| FUE          | 8            | 169-268       | 0.20806                                          | 0.43528 | 0.16643 | 0.19023 |
| CEL          | 6            | 289-298       | 0.20910                                          | 0.42750 | 0.17137 | 0.19203 |
| CER          | 7            | 301-310       | 0.26262                                          | 0.37313 | 0.17679 | 0.18746 |

Table S4 The *cis*-element logos for Arabidopsis

| Region   | Signal element                                                                      | Name  | # of hexamers | Top hexamer | % of Hits |
|----------|-------------------------------------------------------------------------------------|-------|---------------|-------------|-----------|
|          |    | FUE.1 | 24            | AAUGUA      | 99        |
|          |    | FUE.2 | 10            | UAGUAG      | 85        |
|          |    | FUE.3 | 8             | UGAUUC      | 91        |
| -150/-36 |    | FUE.4 | 3             | CAAGUU      | 33        |
|          |    | FUE.5 | 17            | UAAUAA      | 89        |
|          |   | FUE.6 | 24            | UUCUUC      | 99        |
|          |  | FUE.7 | 4             | UUAAGU      | 25        |
|          |  | FUE.8 | 3             | CACUUG      | 14        |
| -35/-10  |  | NUE.1 | 25            | AAUAAA      | 53        |
| -10/+10  |  | CE.1  | 2             | CUUUUG      | 4         |
|          |  | CE.2  | 2             | AAAAAG      | 5         |

**Table S5. Distance of poly(A) sites in 55K to the annotated poly(A) sites\*.**

| Distance (nt) | Number of poly(A) sites | %     |
|---------------|-------------------------|-------|
| 0-10          | 12794                   | 27.56 |
| 11-20         | 5189                    | 11.18 |
| 21-30         | 4103                    | 8.84  |
| 31-50         | 5497                    | 11.84 |
| 51-100        | 8888                    | 19.15 |
| 101-500       | 7761                    | 16.72 |
| 501-1000      | 720                     | 1.55  |
| 1000-10000    | 1392                    | 3.00  |
| >10000        | 80                      | 0.17  |
| Total         | 46424                   | 100   |

\*The Build 3 of the rice genome was used.

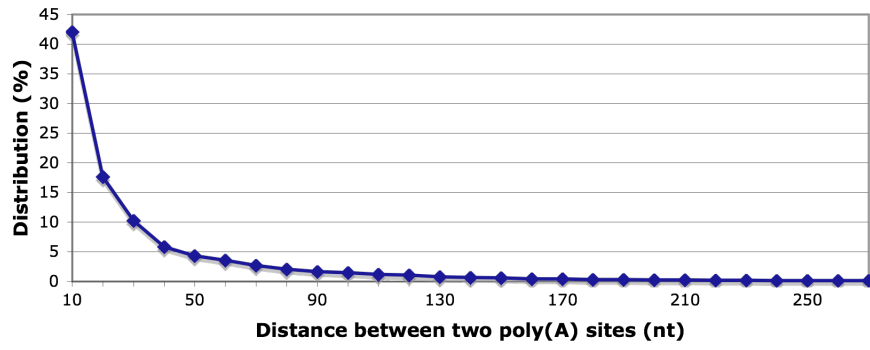

Figure S1. Distribution of the distances between poly(A) sites of the transcripts that undergo APA.

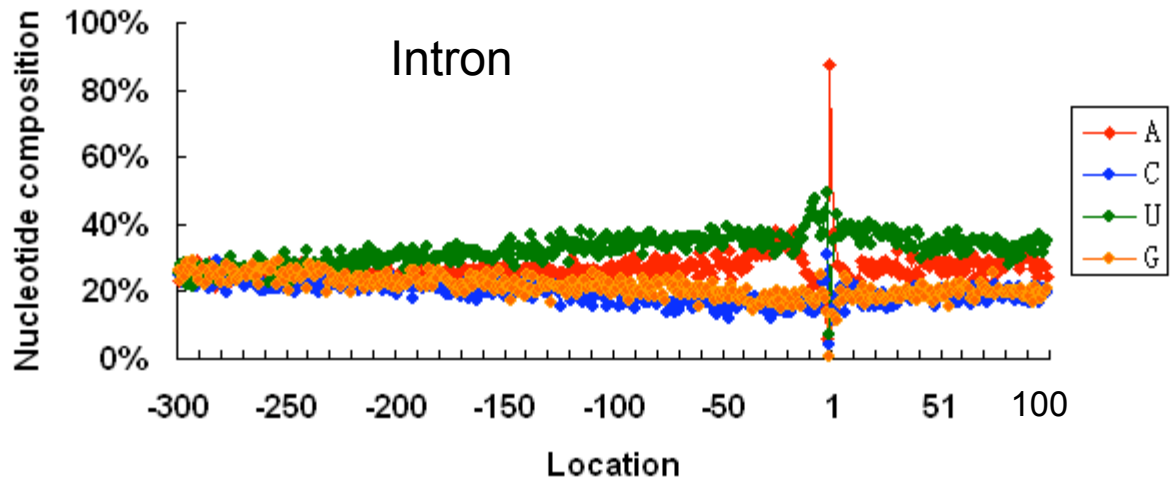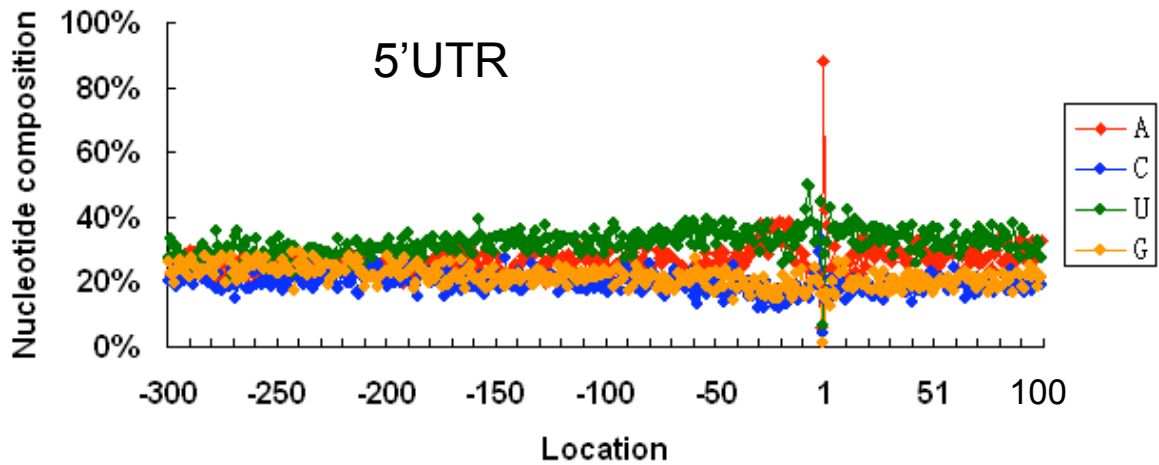

Figure S2. Single nucleotide profiles around the APA sites located in the 5'-UTR and intron regions, respectively. The location designation is the same as Figure 1. Each of the profiles was drawn from about 250 sequences.

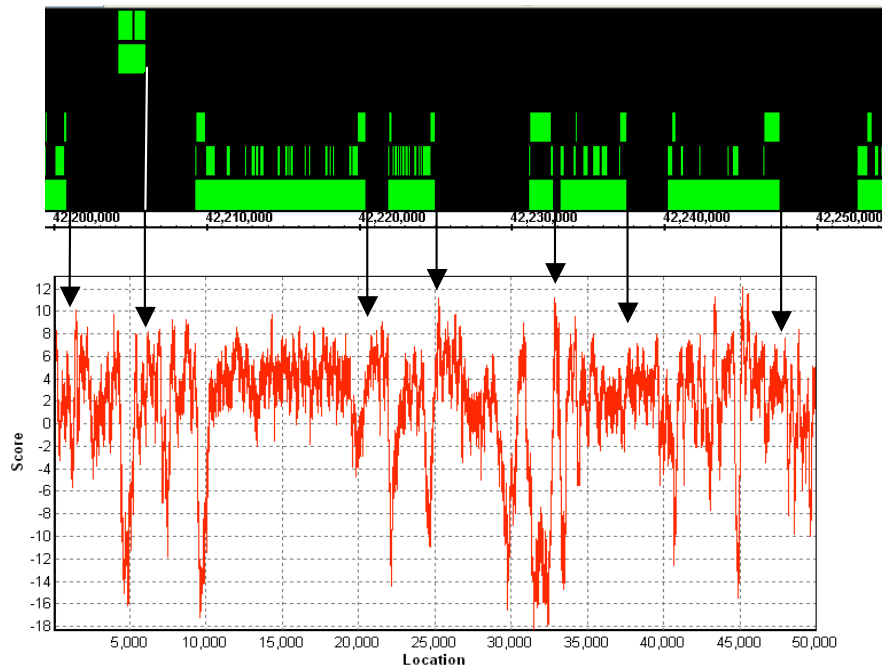

Figure S3. PASS-Rice predictions match the ends of the annotated genes in rice genome. The genome segment was randomly chosen from the Build 3 genome annotation and visualized by using Integrated Genome Browser (<http://www.Affymetrix.com>). The arrows are connecting the ends of the annotated genes and the peaks of PASS-Rice outputs. Genes shown here are (from left to right) Os01g0957600, Os01g0957800, Os01g0957900, Os01g0958000, Os01g0958200, Os01g0958400, Os01g0958500.
